# Supplementary material for: The Cost-Effectiveness of Expanding the UK Newborn Bloodspot Screening Programme to Include Five Additional Inborn Errors of Metabolism
Source: MDPI journal article supplement (doi:10.3390/ijns6040093), 2020-11-20
Supplement: s1 [file s1]

Supplementary material: Costs

Table S1: Diagnosis resource use

| <b>Cost of 1<sup>st</sup> appointment</b>                       | GA1                                                                               | HCU                                                                               | IVA                                                                                                | LCHADD                                                                            | MSUD                                                                              |
|-----------------------------------------------------------------|-----------------------------------------------------------------------------------|-----------------------------------------------------------------------------------|----------------------------------------------------------------------------------------------------|-----------------------------------------------------------------------------------|-----------------------------------------------------------------------------------|
| Staff                                                           | 90 mins Consultant paediatrician<br>90 mins Specialist nurse<br>90 mins Dietician | 60 mins Consultant paediatrician<br>60 mins Specialist nurse<br>60 mins Dietician | 90 mins Consultant paediatrician<br>90 mins Specialist nurse<br>90 mins Dietician                  | 60 mins Consultant paediatrician<br>60 mins Specialist nurse<br>60 mins Dietician | 60 mins Consultant paediatrician<br>60 mins Specialist nurse<br>60 mins Dietician |
| Bloods                                                          | Urinary/organic acids<br>Blood plasma acyl carnatine<br>DNA GA1                   | Plasma quantitative amino acids<br>Total homocysteine                             | Plasma quantitative amino acids<br>Urinary/organic acids<br>Blood plasma acyl carnatine<br>DNA IVA | Urinary/organic acids<br>Blood acylcarnites<br>Genetic confirmation               | Urinary/organic acids<br>Blood plasma AA<br>DNA MSUD                              |
| Other                                                           | Carnitine 100mg/kg/day                                                            | Carnitine 100mg per day (7 days)                                                  | Carnitine 100mg/kg/day                                                                             |                                                                                   |                                                                                   |
| <b>Cost of 2<sup>nd</sup> appointment (Diagnosis confirmed)</b> | 90 mins Consultant paediatrician<br>90 mins Specialist nurse<br>90 mins Dietician | 30 mins Consultant paediatrician<br>30 mins Specialist nurse<br>30 mins Dietician | 60 mins Consultant paediatrician<br>60 mins Specialist nurse<br>60 mins Dietician                  | 30 mins Consultant paediatrician<br>30 mins Specialist nurse<br>30 mins Dietician | 30 mins Consultant paediatrician<br>30 mins Specialist nurse<br>30 mins Dietician |
| <b>Cost of 2<sup>nd</sup> appointment (False positive)</b>      | Same as above                                                                     | Same as above                                                                     | 60 mins Specialist nurse<br>60 mins Dietician                                                      | Same as above                                                                     | Same as above                                                                     |

mins – minutes GA1 - glutaric aciduria type 1, LCHADD - long chain hydroxyacyl CoA dehydrogenase deficiency, MSUD – Maple syrup urine, disease, IVA - isovaleric acidemia, HCU – homocystinuria,

## S2: Management Costs

The costs of longer-term management of the conditions including routine appointments, blood tests, and dietary management were estimated from the pilot study protocol, diet management advice developed for the screening pilot [1], and expert dietician input. Healthcare costs associated with managing the conditions, such as appointments, routine tests, and the costs of dietary supplements were estimated using unit costs from routine data source [2-4]

Table S2a – GA1 costs

|              | Diagnosis                                                                                   | 0-1                                                                                                                                   | 1-6                                                                                                          | 6-15                                                                                                                 | 16+ Years                                                                                                |
|--------------|---------------------------------------------------------------------------------------------|---------------------------------------------------------------------------------------------------------------------------------------|--------------------------------------------------------------------------------------------------------------|----------------------------------------------------------------------------------------------------------------------|----------------------------------------------------------------------------------------------------------|
| Appointments | 90 mins Consultant paediatrician<br>90 mins Specialist nurse<br>90 mins Dietician<br>All x2 | 30 mins Consultant paediatrician x5<br>30 mins Specialist nurse x5<br>60 mins Dietician x5<br>60 mins Dietician x36 (additional apps) | 30 mins Consultant paediatrician x4<br>30 mins Specialist nurse x4<br>60 mins Dietician x4                   | 20 mins Consultant paediatrician x2<br>20 mins Specialist nurse x2<br>30 mins Dietician x2                           | 20 mins Consultant<br>20 mins Dietician                                                                  |
| Costs        | £720                                                                                        | £600                                                                                                                                  | £548                                                                                                         | £171                                                                                                                 | £64                                                                                                      |
| Bloods       | Urinary/organic acids<br>Blood plasma acyl carnatine<br>DNA GA1                             | FBC x5<br>Ca, Pi, LFT x5<br>Plasma amino acids including tryptophan x5<br>Free carnitinex5<br>Micronutrients                          | FBC x4<br>Ca, Pi, LFT x4<br>Plasma amino acids including tryptophan x4<br>Free carnitinex4<br>Micronutrients | FBC x2<br>Ca, Pi, LFT x2<br>Plasma amino acids & ammonia x2<br>Free carnitines & acyl carnitine x2<br>Micronutrients | FBC<br>Ca, Pi, LFT<br>Plasma amino acids & ammonia<br>Free carnitines & acyl carnitine<br>Micronutrients |
| Costs        | £376                                                                                        | £955                                                                                                                                  | £776                                                                                                         | £394                                                                                                                 | £203                                                                                                     |
| Diet         |                                                                                             | Carnitine 100mg/kg/day                                                                                                                | Carnitine 100mg/kg/day                                                                                       | Carnitine 50mg/kg/day                                                                                                |                                                                                                          |

|                   |        |                                                                                                      |                                                        |      |      |
|-------------------|--------|------------------------------------------------------------------------------------------------------|--------------------------------------------------------|------|------|
|                   |        | GA1 anamix to give 1g of protein equivalent per kg/day<br>60 mins Dietician x36<br>(additional apps) | GA1 anamix to give 1g of protein equivalent per kg/day |      |      |
| Dietician cost    | £0     | £1,224                                                                                               | £0                                                     | £0   | £0   |
| Supplements costs | £0     | £2,592                                                                                               | £3,936 - £7,453<br>(depending on age)                  | £0   | £0   |
| Total costs       | £1,096 | £5,371                                                                                               | £5,260 - £8,777                                        | £565 | £267 |

Mins – minutes, FBC – full blood count, ca – calcium, Pi – perfusion index, LFT – liver function tests, GA1 – glutaric aciduria type 1

Table S2b – HCU costs

|              | Diagnosis                                                                                                                                                | 0-1                                                                                                                                                           | 1-2                                                                                                       | 2-3                                                                                                       | 3-6                                                                                                       | 6-11                                                                                                         | 11+                                                                                                          |
|--------------|----------------------------------------------------------------------------------------------------------------------------------------------------------|---------------------------------------------------------------------------------------------------------------------------------------------------------------|-----------------------------------------------------------------------------------------------------------|-----------------------------------------------------------------------------------------------------------|-----------------------------------------------------------------------------------------------------------|--------------------------------------------------------------------------------------------------------------|--------------------------------------------------------------------------------------------------------------|
| Appointments | 60 mins<br>Consultant<br>paediatrician<br>60 mins<br>Specialist<br>nurse<br>60 mins<br>Dietician<br>+ 30 mins each<br>for<br>confirmation<br>appointment | 30 mins<br>Consultant<br>paediatrician x5<br>30 mins<br>Specialist nurse<br>x5<br>30 mins<br>Dietician x5<br>30 mins<br>Dietician x14<br>(additional<br>apps) | 30 mins<br>Consultant<br>paediatrician x4<br>30 mins<br>Specialist nurse<br>x4<br>60 mins<br>Dietician x4 | 30 mins<br>Consultant<br>paediatrician x3<br>30 mins<br>Specialist nurse<br>x3<br>30 mins<br>Dietician x3 | 30 mins<br>Consultant<br>paediatrician x2<br>30 mins<br>Specialist nurse<br>x2<br>30 mins<br>Dietician x2 | 30 mins<br>Consultant<br>paediatrician<br>x2<br>30 mins<br>Specialist nurse<br>x2<br>30 mins<br>Dietician x2 | 30 mins<br>Consultant<br>paediatrician<br>x2<br>30 mins<br>Specialist<br>nurse x2<br>30 mins<br>Dietician x2 |
| Costs        | £360                                                                                                                                                     | £480                                                                                                                                                          | £480                                                                                                      | £360                                                                                                      | £240                                                                                                      | £240                                                                                                         | £240                                                                                                         |

|                      |                                                                |                                                                                                                                                   |                                                                                |                                                                                |                                                                                |                                                                                |                                                                                   |
|----------------------|----------------------------------------------------------------|---------------------------------------------------------------------------------------------------------------------------------------------------|--------------------------------------------------------------------------------|--------------------------------------------------------------------------------|--------------------------------------------------------------------------------|--------------------------------------------------------------------------------|-----------------------------------------------------------------------------------|
| Bloods               | Plasma<br>quantitative<br>amino acids<br>Total<br>homocysteine | Plasma<br>quantitative<br>amino acids x27<br>Total<br>homocysteine<br>x27<br>B12<br>Folate                                                        | Plasma<br>quantitative<br>amino acids x6<br>Total<br>homocysteine<br>x6<br>B12 | Plasma<br>quantitative<br>amino acids x4<br>Total<br>homocysteine<br>x4<br>B12 | Plasma<br>quantitative<br>amino acids x4<br>Total<br>homocysteine<br>x4<br>B12 | Plasma<br>quantitative<br>amino acids x4<br>Total<br>homocysteine<br>x4<br>B12 | Plasma<br>quantitative<br>amino acids<br>x4<br>Total<br>homocysteine<br>x4<br>B12 |
| Costs                | £115                                                           | £2,990                                                                                                                                            | £702                                                                           | £472                                                                           | £472                                                                           | £472                                                                           | £472                                                                              |
| Diet                 |                                                                | HCU anamix to<br>give 75ml per<br>day<br>Pyridoxine<br>50mg per day<br>Folate acid 5mg<br>per day30 mins<br>Dietician x14<br>(additional<br>apps) | HCU gel, 1 24g<br>sachet per day,<br>(10g)                                     | HCU gel, 1 24g<br>sachet per day,<br>(10g)                                     | HCU gel, 1 24g<br>sachet per day,<br>(10g)                                     | HCU cooler, 1<br>130ml sachet<br>per day, (15g)                                | HCU express<br>20, 1 34g<br>sachet per<br>day , (20g)                             |
| Supplements<br>costs |                                                                | £2,354                                                                                                                                            | £2,334                                                                         | £2,334                                                                         | £2,334                                                                         | £3,478                                                                         | £4,778                                                                            |
| Other                |                                                                | Baseline<br>ophthalmology                                                                                                                         | Ophthalmology                                                                  | Ophthalmology                                                                  | Ophthalmology<br>Psychometric<br>assessment (at<br>4)                          | Ophthalmology<br>Psychometric<br>assessment (at<br>10)                         | Dexa Scan<br>(yearly from<br>16)                                                  |
| Other                |                                                                | £498                                                                                                                                              | £109                                                                           | £250                                                                           | £250                                                                           | £250                                                                           | £179                                                                              |
| Total costs          | £475                                                           | £6,322                                                                                                                                            | £3,625                                                                         | £3,416                                                                         | £3,296                                                                         | £4,440                                                                         | £5,669                                                                            |

mins – minutes, HCU - homocystinuria

Table S2c – IVA costs – High risk

|              | Diagnosis                                                                                                                     | 0-1                                                                                                                                  | 1-5                                                                                                                     | 6-7                                                                                                                     | 7-15                                                                                                                    | 16+                                                                                                         |
|--------------|-------------------------------------------------------------------------------------------------------------------------------|--------------------------------------------------------------------------------------------------------------------------------------|-------------------------------------------------------------------------------------------------------------------------|-------------------------------------------------------------------------------------------------------------------------|-------------------------------------------------------------------------------------------------------------------------|-------------------------------------------------------------------------------------------------------------|
| Appointments | 90 mins Consultant paediatrician<br>90 mins Specialist nurse<br>90 mins Dietician + 30 mins each for confirmation appointment | 30 mins Consultant paediatrician x3<br>30 mins Specialist nurse x3<br>30 mins Dietician x3<br>30 mins Dietician x3 (additional apps) | 30 mins Consultant paediatrician x4<br>30 mins Specialist nurse x4<br>30 mins Dietician x4                              | 30 mins Consultant paediatrician x2<br>30 mins Specialist nurse x2<br>30 mins Dietician x2                              | 30 mins Consultant paediatrician x2<br>30 mins Specialist nurse x2<br>30 mins Dietician x2                              | 30 mins Consultant                                                                                          |
| Costs        | £600                                                                                                                          | £360                                                                                                                                 | £480                                                                                                                    | £240                                                                                                                    | £240                                                                                                                    | £79                                                                                                         |
| Bloods       | Plasma quantitative amino acids<br>Urinary/organic acids<br>Blood plasma acyl carnatine<br>DNA IVA                            | FBC x3<br>Ca, Pi, LFT x3<br>Plasma quantitative amino acids x3<br>Free carnitines & acyl carnatine x3<br>Micronutrients              | FBC x4<br>Ca, Pi, LFT x4<br>Plasma quantitative amino acids x4<br>Free carnitines & acyl carnatine x4<br>Micronutrients | FBC x2<br>Ca, Pi, LFT x2<br>Plasma quantitative amino acids x2<br>Free carnitines & acyl carnatine x2<br>Micronutrients | FBC x2<br>Ca, Pi, LFT x2<br>Plasma quantitative amino acids x2<br>Free carnitines & acyl carnatine x2<br>Micronutrients | FBC<br>Ca, Pi, LFT<br>Plasma quantitative amino acids<br>Free carnitines & acyl carnatine<br>Micronutrients |
| Costs        | £456                                                                                                                          | £573                                                                                                                                 | £776                                                                                                                    | £394                                                                                                                    | £394                                                                                                                    | £203                                                                                                        |
| Diet         | Carnitine 100mg/kg/day                                                                                                        | Carnitine 100mg/kg/day<br>Energivit 30ml/kg/day<br>IVA anamix 30ml/kg/day                                                            | Carnitine 100mg/kg/day<br>Paediatric seravit 17g per day (increases 1-2g per day each year)                             | Carnitine 100mg/kg/day<br>Paediatric seravit 24g per day (increases 1-2g per day each year)                             | Carnitine 100mg/kg/day<br>Paediatric seravit 27g per day (increases 1-2g per day each year)                             | Carnitine 50mg -100mg/kg/day                                                                                |

|                      |       |        |                              |                              |                                 |        |
|----------------------|-------|--------|------------------------------|------------------------------|---------------------------------|--------|
|                      |       |        | Nutrini 200ml<br>one per day | Nutrini 200ml<br>one per day | Paediasure 500ml<br>one per day |        |
| Supplements<br>costs | £21   | £2,460 | £3,043 (average 5<br>years)  | £4,058                       | £6,707 (average 9<br>years)     | £3,885 |
| Other                |       | £51    |                              |                              |                                 |        |
| Total costs          | £1077 | £3,444 | £4,299                       | £4,692                       | £7,341                          | £4,167 |

Mins – minutes, FBC – full blood count, ca – calcium, Pi – perfusion index, LFT – liver function tests, g – gram, kg – kilogram

Table S2d – IVA costs – Low risk

|              | Diagnosis                                                                                                                                    | 0-1                                                                                                                                                        | 1-5                                                                                                                              | 6-15                                                                                                                             | 16+                                                                                                                             |
|--------------|----------------------------------------------------------------------------------------------------------------------------------------------|------------------------------------------------------------------------------------------------------------------------------------------------------------|----------------------------------------------------------------------------------------------------------------------------------|----------------------------------------------------------------------------------------------------------------------------------|---------------------------------------------------------------------------------------------------------------------------------|
| Appointments | 90 mins Consultant<br>paediatrician<br>90 mins Specialist<br>nurse<br>90 mins Dietician<br>+ 30 mins each for<br>confirmation<br>appointment | 30 mins Consultant<br>paediatrician x1.5<br>30 mins Specialist<br>nurse x1.5<br>30 mins Dietician<br>x1.5<br>30 mins Dietician<br>x1.5(additional<br>apps) | 30 mins<br>Consultant<br>paediatrician x2<br>30 mins Specialist<br>nurse x2<br>30 mins Dietician<br>x2                           | 30 mins<br>Consultant<br>paediatrician x1<br>30 mins Specialist<br>nurse x1<br>30 mins Dietician<br>x1                           | 30 mins<br>Consultant x1                                                                                                        |
| Costs        | £600                                                                                                                                         | £180                                                                                                                                                       | £240                                                                                                                             | £120                                                                                                                             | £79                                                                                                                             |
| Bloods       | Plasma quantitative<br>amino acids<br>Urinary/organic<br>acids<br>Blood plasma acyl<br>carnitine<br>DNA IVA                                  | FBC x1.5<br>Ca, Pi, LFT x1.5<br>Plasma<br>quantitative amino<br>acids x1.5<br>Free carnitines &<br>acyl carnitine x1.5<br>Micronutrients                   | FBC x2<br>Ca, Pi, LFT x2<br>Plasma<br>quantitative<br>amino acids x2<br>Free carnitines &<br>acyl carnitine x2<br>Micronutrients | FBC x1<br>Ca, Pi, LFT x1<br>Plasma<br>quantitative<br>amino acids x1<br>Free carnitines &<br>acyl carnitine x1<br>Micronutrients | FBC x1<br>Ca, Pi, LFT x1<br>Plasma<br>quantitative<br>amino acids x1<br>Free carnitines &<br>acyl carnitine<br>Micronutrientsx1 |
| Costs        | £456                                                                                                                                         | £287                                                                                                                                                       | £388                                                                                                                             | £197                                                                                                                             | £203                                                                                                                            |

|             |        |      |      |      |      |
|-------------|--------|------|------|------|------|
| Diet        | £21    |      |      |      |      |
| Total costs | £1,077 | £467 | £628 | £317 | £282 |

Mins – minutes, FBC – full blood count, ca – calcium, Pi – perfusion index, LFT – liver function tests

Table S2e – LCHADD costs

|                   | Diagnosis                                                                                                                        | 0-1                                                                                        | 1-18                                                                                       |
|-------------------|----------------------------------------------------------------------------------------------------------------------------------|--------------------------------------------------------------------------------------------|--------------------------------------------------------------------------------------------|
| Appointments      | 90 mins Consultant paediatrician<br>90 mins Specialist nurse<br>90 mins Dietician<br>+ 60 mins each for confirmation appointment | 30 mins Consultant paediatrician x4<br>30 mins Specialist nurse x4<br>30 mins Dietician x4 | 30 mins Consultant paediatrician x4<br>30 mins Specialist nurse x4<br>30 mins Dietician x4 |
| Costs             | £360                                                                                                                             | £480                                                                                       | £480                                                                                       |
| Bloods            | Blood acylcarnites<br>Urine Organic Acids<br>Genetic confirmation                                                                | Weekly plasma amino acids until 4 months – bi-weekly after                                 | Bi-weekly plasma amino acids                                                               |
| Costs             | £315                                                                                                                             | £416                                                                                       | £313                                                                                       |
| Diet              |                                                                                                                                  | Lipistart 2g/kg/day                                                                        |                                                                                            |
| Supplements costs |                                                                                                                                  | £254                                                                                       |                                                                                            |
| Total costs       | £675                                                                                                                             | £1,150                                                                                     | £793                                                                                       |

Mins – minutes, g – gram, kg - kilogram

Table S2f: MSUD costs

|                   | Diagnosis                                                                                                            | 0-1                                                                                              | 1-5                                                                                           | 6-10                                                                                          | 11-15                                                                                         | 16+                                                                                           |
|-------------------|----------------------------------------------------------------------------------------------------------------------|--------------------------------------------------------------------------------------------------|-----------------------------------------------------------------------------------------------|-----------------------------------------------------------------------------------------------|-----------------------------------------------------------------------------------------------|-----------------------------------------------------------------------------------------------|
| Appointments      | 60 mins Consultant paediatrician<br>60 mins Specialist nurse<br>60 mins Dietician +<br>30 mins each for confirmation | 30 mins Consultant paediatrician x4<br>30 mins Specialist nurse x4<br>30 mins Dietician x4       | 30 mins Consultant paediatrician x4<br>30 mins Specialist nurse x4<br>30 mins Dietician x4    | 30 mins Consultant paediatrician x2<br>30 mins Specialist nurse x2<br>30 mins Dietician x2    | 30 mins Consultant paediatrician x2<br>30 mins Specialist nurse x2<br>30 mins Dietician x2    | 30 mins Consultant                                                                            |
| Costs             | £360                                                                                                                 | £480                                                                                             | £480                                                                                          | £480                                                                                          | £480                                                                                          | £480                                                                                          |
| Bloods            | Urinary/organic acids<br>Blood plasma AA<br>DNA MSUD                                                                 | Weekly BCAA monitoring until 8 weeks<br>Bi-weekly BCAA thereafter                                | Bi-weekly BCAA monitoring                                                                     | Bi-weekly BCAA monitoring                                                                     | Bi-weekly BCAA monitoring                                                                     | Bi-weekly BCAA monitoring                                                                     |
| Costs             | £115                                                                                                                 | £313                                                                                             | £313                                                                                          | £313                                                                                          | £313                                                                                          | £313                                                                                          |
| Diet              |                                                                                                                      | 3g/kg/day MSUD Anamix<br>Isoleucine and valine supplements<br>300mg per day<br>Protein exchanges | 3g/kg/day MSUD Gel<br>Isoleucine and valine supplements<br>300mg per day<br>Protein exchanges | 3g/kg/day MSUD Gel<br>Isoleucine and valine supplements<br>300mg per day<br>Protein exchanges | 3g/kg/day MSUD Gel<br>Isoleucine and valine supplements<br>300mg per day<br>Protein exchanges | 3g/kg/day MSUD Gel<br>Isoleucine and valine supplements<br>300mg per day<br>Protein exchanges |
| Supplements costs |                                                                                                                      | £8,318                                                                                           | £10,852 (average)                                                                             | £12,502 (average)                                                                             | £16,621 (average)                                                                             | £16,772 (average)                                                                             |
| Total costs       | £475                                                                                                                 | £9,111                                                                                           | £11,654                                                                                       | £13,295                                                                                       | £17,414                                                                                       | £17,565                                                                                       |

Mins- minutes, BCAA – branched chain amino acids, MSUD – maple syrup urine disease, g – gram, kg - kilogram



### S3: Health and social care costs of crises and long-term outcomes

The costs associated with an encephalopathy crisis for GA1, MSUD, and LCHADD and preventative emergency admissions are shown in Table S3a. The length of stay was estimated from an expert panel and the cost per day and dialysis were taken from NHS Reference Costs [4]. The frequency of encephalopathy crises were estimated from Kolker et al [5] and an expert panel. The frequency of preventative hospital admissions, shown in Table S3b, were estimated from an expert panel.

Table S3a: Duration and costs of encephalopathy crises and episodes of intercurrent illness requiring preventive management

| <b>Initial encephalopathy crisis</b>            | Mean    | Lower   | Upper   |
|-------------------------------------------------|---------|---------|---------|
| Duration (days)                                 | 24      | 21      | 28      |
| NICU/PICU cost                                  | £1,117  | £844    | £1,307  |
| Dialysis                                        | £198    | £167    | £167    |
| Dialysis sessions per week                      | 3       | 3       | 3       |
| Total                                           | £28,845 | £19,218 | £38,606 |
| <b>Second encephalopathy crisis</b>             |         |         |         |
| Duration (days)                                 | 4       | 2       | 7       |
| NICU/PICU cost                                  | £1,117  | £844    | £1,307  |
| Dialysis                                        | £198    | £167    | £167    |
| Dialysis sessions per week                      | 3       | 3       | 3       |
| Total                                           | £4,808  | £1,830  | £9,652  |
| <b>Preventive emergency hospital admissions</b> |         |         |         |
| Duration – Normal child (days)                  | 3       | 2       | 4       |
| NICU/PICU cost                                  | £440    | £347    | £480    |
| Total                                           | £1,321  | £695    | £1,920  |
| Duration – Dystonic child (days)                | 4       | 2       | 7       |
| NICU/PICU cost                                  | £795    | £662    | £927    |
| Total                                           | £3,181  | £1,324  | £6,486  |

NICU – Neonatal intensive care unit, PICU – Paediatric intensive care unit

Table S3b: Frequency and annual costs of episodes of intercurrent illness requiring preventive management.

| Age (years) | Episode frequency |     |     | Preventive episodes requiring hospitalisation |               |
|-------------|-------------------|-----|-----|-----------------------------------------------|---------------|
|             | Mid               | Min | Max | Asymptomatic                                  | With dystonia |
| 1           | 4                 | 2   | 6   | £5,283                                        | £3,391        |
| 2           | 2                 | 1   | 4   | £2,641                                        | £6,362        |
| 3           | 2                 | 1   | 4   | £2,641                                        | £6,362        |
| 4           | 2                 | 1   | 4   | £2,641                                        | £6,362        |
| 5           | 2                 | 1   | 4   | £2,641                                        | £6,362        |
| 6           | 2                 | 1   | 4   | £2,641                                        | £6,362        |
| 6 - 12      | 2                 | 1   | 4   | £0                                            | £6,362        |

For all conditions the costs associated with living with developmental delay or neurological impairment were estimated from the PSSRU Unit Costs of Health and Social Care 2012 using autism [2] as a proxy. The costs per year are shown in Table S3c

Table S3c: Health and social care costs associated with neurological impairment/developmental delay

| Health state  | Age     |          |          |         |
|---------------|---------|----------|----------|---------|
|               | 0-3     | 4-11     | 12-17    | 18+     |
| Mild          | £ 652   | £ 23,265 | £ 23,265 | £9,009  |
| Moderate      | £ 1,353 | £ 23,339 | £ 38,221 | £41,808 |
| Severe        | £ 1,406 | £ 50,336 | £ 82,432 | £90,168 |
| Mild/moderate | £652    | £23,339  | £38,221  | £52,077 |

For HCU the incidence, type and timing of surgery for lens removal and retinal detachment in respect of the ocular problems of HCU are taken from Taylor et al [6]. The unit costs of surgery are taken from the NHS Reference Costs [4] and are estimated at £197.10 for correcting retinal detachment and £1440.43 for lens removal. Surgery is estimated to be required in 75% of symptomatically detected HCY and the costs are applied at the age of 9 years.

Figure S1: Cost-effectiveness planes

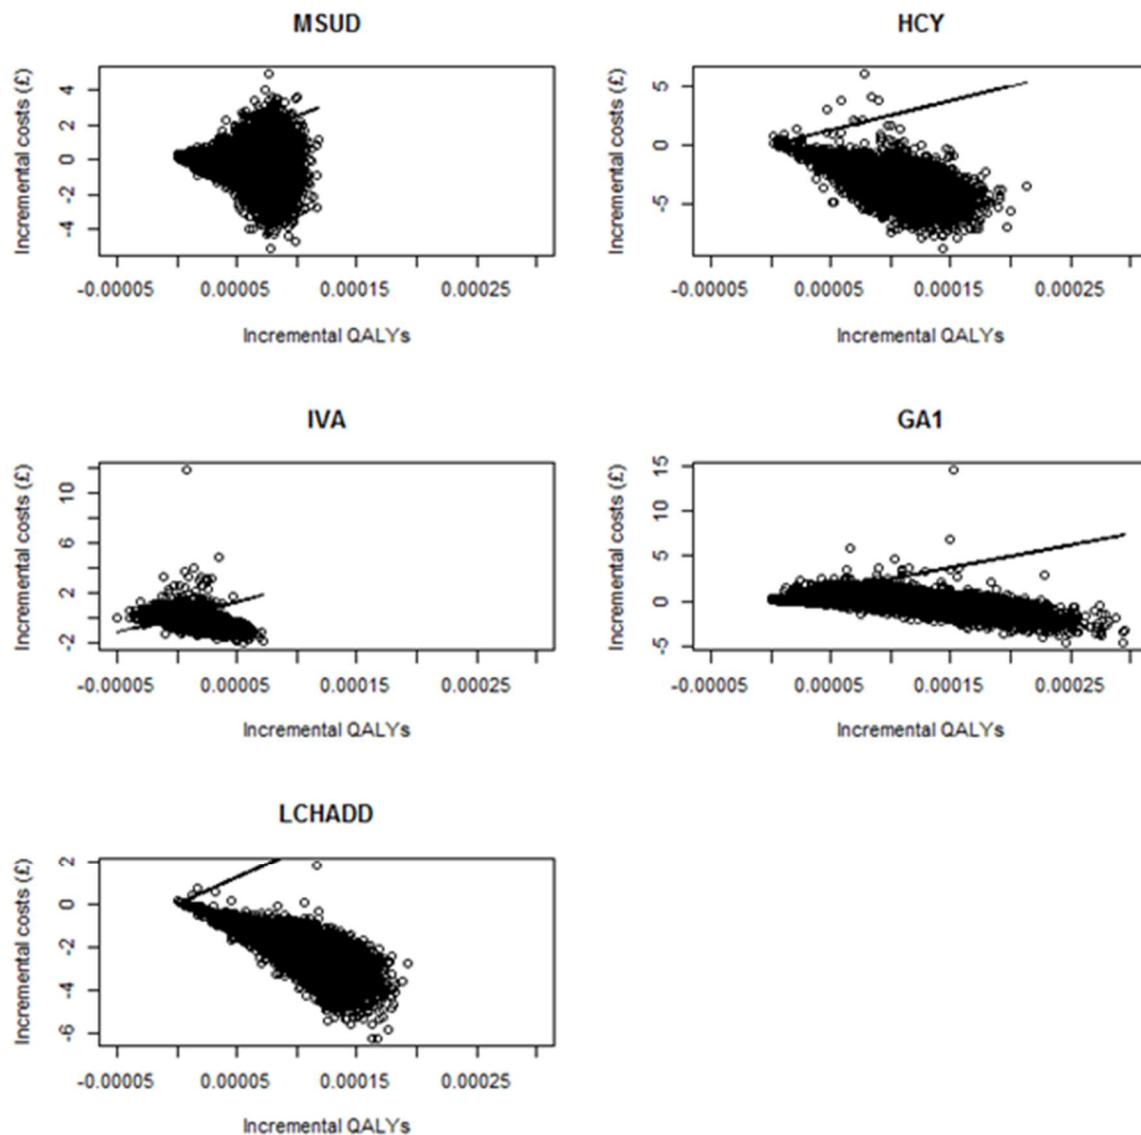

Each circle represents one model run. The diagonal line represents the cost-effectiveness threshold at £25,000 per quality adjusted life year (QALY). Each circle below the line represents a model run that is below the threshold of £25,000 per QALY and each circle above the line represents a model run that is above the threshold.

Figure S2: QALYs in symptomatically and screen detected cases

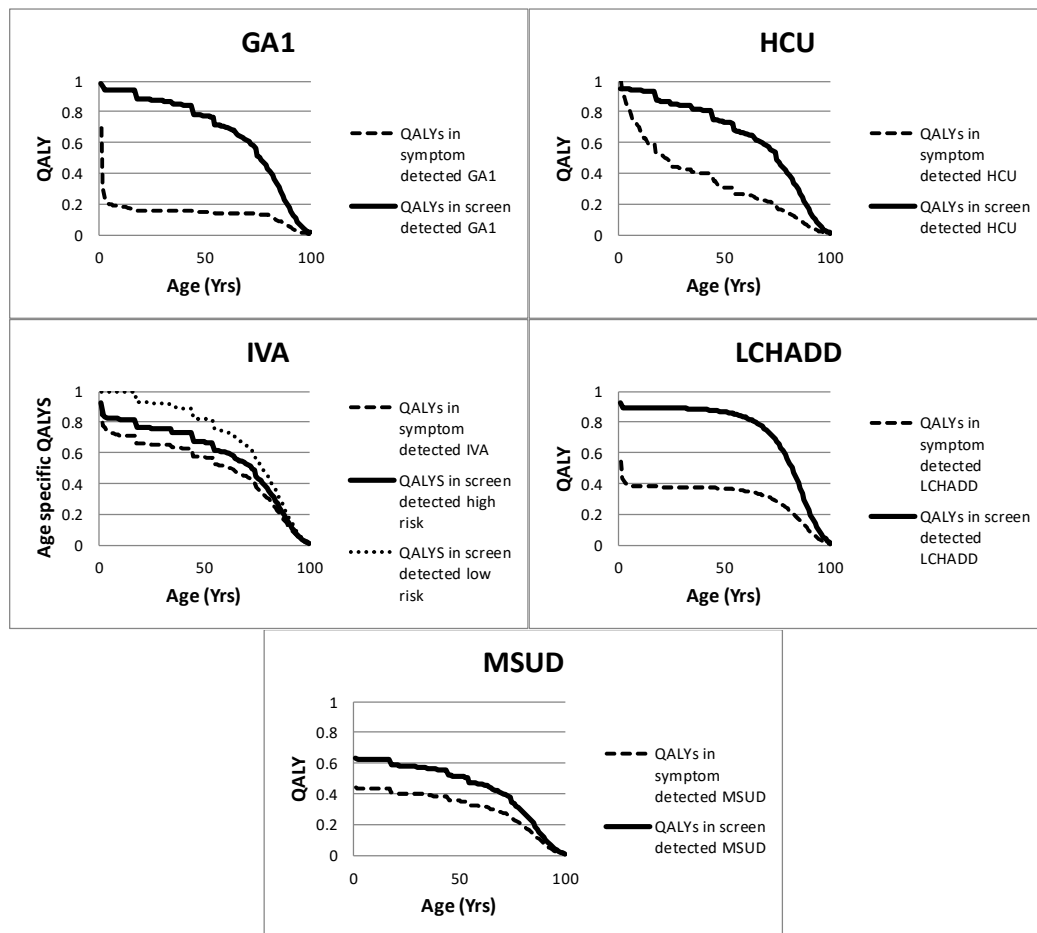

This figure shows the modelled QALY estimates against age for each of the five conditions.

## References

1. Sheffield Children's Hospitals NHS Foundation Trust. Expanded Newborn Screening. Available online: <http://www.expandedscreening.org/site/home/start.asp> (accessed on 13th February 2012).
2. Curtis, L. *Unit Costs of Health and Social Care 2012*; University of Kent: Canterbury, 2012.
3. Paediatric Formulary Committee. *BNF for Children*; BMJ Group, Pharmaceutical Press, and RCPCH Publications: London, 2011-2012.
4. Department of Health. NHS Reference Costs 2011 to 2012. Available online: <https://www.gov.uk/government/publications/nhs-reference-costs-financial-year-2011-to-2012> (accessed on 4th July 2012).
5. Kölker, S.; Garbade, S.F.; Boy, N.; Maier, E.M.; Meissner, T.; Mühlhausen, C.; Hennermann, J.B.; Lücke, T.; Häberle, J.; Baumkötter, J., et al. Decline of Acute Encephalopathic Crises in Children with Glutaryl-CoA Dehydrogenase Deficiency Identified by Newborn Screening in Germany. *Pediatric Research* **2007**, *62*, 357-363, doi:10.1203/PDR.0b013e318137a124.
6. Taylor, R.H.; Burke, J.; O'Keefe, M.; Beighi, B.; Naughton, E. Ophthalmic abnormalities in homocystinuria: the value of screening. *Eye (Lond)* **1998**, *12* ( Pt 3a), 427-430, doi:10.1038/eye.1998.100.
